# Supplementary material
Source: Springer Nature journal article supplement (https://www.springermedizin.de/resource/supplementary/13229_2014_146_MOESM1_ESM.pdf/9676286)
Supplement: MOESM1 [file 9676286]

**Additional table 1.** Association analyses between autistic-like traits and five SNPs after adjustment for age<sup>a</sup>.

| Autistic-like traits                      | SNP       | All     |                          |               | Boys    |                          |                | Girls   |                          |               |  |
|-------------------------------------------|-----------|---------|--------------------------|---------------|---------|--------------------------|----------------|---------|--------------------------|---------------|--|
|                                           |           | p-value | effect size <sup>b</sup> | CI (95%)      | p-value | effect size <sup>b</sup> | CI (95%)       | p-value | effect size <sup>b</sup> | CI (95%)      |  |
| CDH 9/10                                  | rs4307059 | 0.734   | -0.007                   | 0.033, 0.047  | 0.632   | 0.016                    | -0.051, 0.083  | 0.732   | 0.007                    | -0.033, 0.048 |  |
| CNTNAP2                                   | rs2710102 | 0.507   | 0.013                    | -0.026, 0.052 | 0.647   | 0.015                    | -0.050, 0.080  | 0.716   | 0.008                    | -0.033, 0.048 |  |
| CNTNAP2                                   | rs7794745 | 0.104   | -0.034                   | -0.075, 0.007 | 0.045   | -0.069                   | -0.136, -0.002 | 0.712   | 0.008                    | -0.034, 0.050 |  |
| RELN                                      | rs362691  | 0.343   | -0.028                   | -0.086, 0.030 | 0.628   | -0.024                   | -0.120, 0.072  | 0.676   | -0.013                   | -0.072, 0.047 |  |
| SHANK3                                    | rs9616915 | 0.196   | -0.025                   | -0.064, 0.013 | 0.426   | -0.026                   | -0.089, 0.038  | 0.448   | -0.015                   | -0.055, 0.024 |  |
| <i>Restricted and Repetitive behavior</i> |           |         |                          |               |         |                          |                |         |                          |               |  |
| CDH 9/10                                  | rs4307059 | 0.159   | 0.011                    | -0.004, 0.027 | 0.302   | 0.014                    | -0.013, 0.041  | 0.164   | 0.011                    | -0.005, 0.028 |  |
| CNTNAP2                                   | rs2710102 | 0.583   | 0.004                    | -0.011, 0.020 | 0.565   | 0.008                    | -0.018, 0.033  | 0.888   | -0.001                   | -0.017, 0.015 |  |
| CNTNAP2                                   | rs7794745 | 0.127   | -0.012                   | -0.028, 0.004 | 0.081   | -0.024                   | -0.051, 0.003  | 0.871   | -0.001                   | -0.018, 0.015 |  |
| RELN                                      | rs362691  | 0.353   | -0.011                   | -0.034, 0.012 | 0.738   | -0.007                   | -0.045, 0.032  | 0.623   | -0.006                   | -0.029, 0.018 |  |
| SHANK3                                    | rs9616915 | 0.184   | -0.010                   | -0.026, 0.005 | 0.274   | -0.014                   | -0.040, 0.011  | 0.665   | -0.003                   | -0.019, 0.012 |  |
| <i>Social interaction impairment</i>      |           |         |                          |               |         |                          |                |         |                          |               |  |
| CDH 9/10                                  | rs4307059 | 0.794   | -0.002                   | -0.018, 0.014 | 0.762   | -0.004                   | -0.030, 0.022  | 0.673   | 0.004                    | -0.014, 0.022 |  |
| CNTNAP2                                   | rs2710102 | 0.833   | -0.002                   | -0.017, 0.014 | 0.652   | -0.006                   | -0.031, 0.020  | 0.762   | 0.003                    | -0.015, 0.020 |  |
| CNTNAP2                                   | rs7794745 | 0.31    | -0.008                   | -0.025, 0.008 | 0.050   | -0.026                   | -0.053, <0.01  | 0.303   | 0.010                    | -0.009, 0.028 |  |
| RELN                                      | rs362691  | 0.946   | -0.001                   | -0.024, 0.023 | 0.834   | 0.004                    | -0.034, 0.042  | 0.975   | <0.001                   | -0.026, 0.026 |  |
| SHANK3                                    | rs9616915 | 0.165   | -0.011                   | -0.027, 0.005 | 0.185   | -0.017                   | -0.042, 0.008  | 0.779   | -0.002                   | -0.02, 0.015  |  |
| <i>Language impairment</i>                |           |         |                          |               |         |                          |                |         |                          |               |  |
| CDH 9/10                                  | rs4307059 | 0.732   | -0.003                   | -0.018, 0.013 | 0.698   | 0.005                    | -0.020, 0.030  | 0.352   | -0.008                   | -0.026, 0.009 |  |
| CNTNAP2                                   | rs2710102 | 0.321   | 0.008                    | -0.008, 0.023 | 0.359   | 0.012                    | -0.013, 0.036  | 0.537   | 0.006                    | -0.012, 0.023 |  |
| CNTNAP2                                   | rs7794745 | 0.184   | -0.011                   | -0.027, 0.005 | 0.292   | -0.014                   | -0.039, 0.012  | 0.514   | -0.006                   | -0.025, 0.012 |  |
| RELN                                      | rs362691  | 0.289   | -0.012                   | -0.035, 0.011 | 0.305   | -0.019                   | -0.056, 0.017  | 0.689   | -0.005                   | -0.032, 0.021 |  |
| SHANK3                                    | rs9616915 | 0.841   | -0.002                   | -0.017, 0.014 | 0.635   | 0.006                    | -0.018, 0.030  | 0.434   | -0.007                   | -0.024, 0.010 |  |

<sup>a</sup>The children's age when their parents answered the A-TAC questionnaire (9 or 12 years old). <sup>b</sup>Effect size presented as the regression coefficient (95% CI). A-TAC=Autism-Tics, ADHD, and Other Co-morbidities inventory.

**Additional table 2.** ASD<sup>a</sup> case-control analyses after adjustment for age<sup>b</sup>.

| Gene            | SNP       | Genotype | N (case/control) | p-value <sup>c</sup> | OR (CI 95%)         |
|-----------------|-----------|----------|------------------|----------------------|---------------------|
| <i>CDH 9/10</i> | rs4307059 | C/C      | 12 / 1651        | 0.836                | 1.082 (0.593-2.174) |
|                 |           | T/C      | 37 / 5527        |                      | 1.159 (0.714-1.883) |
|                 |           | T/T      | 36 / 4730        |                      |                     |
| <i>CNTNAP2</i>  | rs2710102 | A/A      | 25 / 3223        | 0.805                | 0.810 (0.421-1.559) |
|                 |           | A/G      | 44 / 5932        |                      | 0.845 (0.467-1.529) |
|                 |           | G/G      | 17 / 2735        |                      |                     |
| <i>CNTNAP2</i>  | rs7794745 | A/A      | 41 / 4963        | 0.129                | 0.356 (0.129-0.979) |
|                 |           | T/A      | 40 / 5493        |                      | 0.422 (0.155-1.172) |
|                 |           | T/T      | 5 / 1559         |                      |                     |
| <i>RELN</i>     | rs362691  | C/C+C/G  | 20 / 2820        | 0.927                | 1.025 (0.602-1.745) |
|                 |           | G/G      | 63 / 9076        |                      |                     |
| <i>SHANK3</i>   | rs9616915 | C/C      | 30 / 3086        | 0.094                | 0.761 (0.423-1.369) |
|                 |           | T/C      | 31 / 5808        |                      | 1.369 (0.767-2.447) |
|                 |           | T/T      | 21 / 2906        |                      |                     |

<sup>a</sup>Above the score 8.5 on A-TAC. <sup>b</sup>The children's age when their parents answered the A-TAC questionnaire (9 or 12 years old). <sup>c</sup>Uncorrected p-value. ASD=Autism spectrum disorder. A-TAC=Autism-Tics, ADHD, and Other Co-morbidities inventory.

**Additional table 3.** Association between genetic factors for neurodevelopmental problems (NDPs) and five SNPs after adjustment for age<sup>a</sup>.

| General NDP              |                 | All       |                          |          | Boys          |                          |          | Girls         |                          |          |               |
|--------------------------|-----------------|-----------|--------------------------|----------|---------------|--------------------------|----------|---------------|--------------------------|----------|---------------|
|                          | SNP             | p-value   | effect size <sup>b</sup> | CI (95%) | p-value       | effect size <sup>b</sup> | CI (95%) | p-value       | effect size <sup>b</sup> | CI (95%) |               |
|                          | <i>CDH 9/10</i> | rs4307059 | 0.961                    | 0.001    | -0.021, 0.022 | 0.660                    | 0.007    | -0.024, 0.037 | 0.811                    | -0.004   | -0.034, 0.027 |
|                          | <i>CNTNAP2</i>  | rs2710102 | 0.479                    | 0.008    | -0.014, 0.030 | 0.126                    | 0.025    | -0.007, 0.058 | 0.643                    | -0.006   | -0.032, 0.020 |
|                          | <i>CNTNAP2</i>  | rs7794745 | 0.591                    | -0.006   | -0.028, 0.016 | 0.168                    | -0.023   | -0.055, 0.010 | 0.573                    | 0.008    | -0.019, 0.034 |
|                          | <i>RELN</i>     | rs362691  | 0.553                    | -0.009   | -0.041, 0.022 | 0.869                    | 0.004    | -0.040, 0.048 | 0.291                    | -0.025   | -0.072, 0.022 |
|                          | <i>SHANK3</i>   | rs9616915 | 0.693                    | 0.004    | -0.017, 0.025 | 0.862                    | 0.003    | -0.027, 0.032 | 0.710                    | 0.006    | -0.025, 0.037 |
| <b>Impulsivity</b>       |                 |           |                          |          |               |                          |          |               |                          |          |               |
|                          | <i>CDH 9/10</i> | rs4307059 | 0.555                    | 0.005    | -0.011, 0.021 | 0.572                    | 0.006    | -0.016, 0.028 | 0.957                    | 0.001    | -0.024, 0.025 |
|                          | <i>CNTNAP2</i>  | rs2710102 | 0.371                    | 0.008    | -0.009, 0.025 | 0.340                    | 0.013    | -0.013, 0.038 | 0.781                    | 0.003    | -0.019, 0.025 |
|                          | <i>CNTNAP2</i>  | rs7794745 | 0.601                    | 0.004    | -0.012, 0.021 | 0.559                    | 0.007    | -0.017, 0.031 | 0.930                    | 0.001    | -0.021, 0.023 |
|                          | <i>RELN</i>     | rs362691  | 0.431                    | -0.010   | -0.033, 0.014 | 0.870                    | 0.003    | -0.029, 0.034 | 0.113                    | -0.030   | -0.068, 0.007 |
|                          | <i>SHANK3</i>   | rs9616915 | 0.146                    | -0.012   | -0.028, 0.004 | 0.065                    | -0.020   | -0.042, 0.001 | 0.987                    | <0.001   | -0.025, 0.025 |
| <b>Learning problems</b> |                 |           |                          |          |               |                          |          |               |                          |          |               |
|                          | <i>CDH 9/10</i> | rs4307059 | 0.403                    | -0.007   | -0.023, 0.009 | 0.474                    | -0.008   | -0.028, 0.013 | 0.708                    | -0.005   | -0.033, 0.022 |
|                          | <i>CNTNAP2</i>  | rs2710102 | 0.793                    | 0.002    | -0.014, 0.019 | 0.543                    | -0.008   | -0.032, 0.017 | 0.275                    | 0.012    | -0.010, 0.034 |
|                          | <i>CNTNAP2</i>  | rs7794745 | 0.496                    | -0.006   | -0.024, 0.012 | 0.630                    | 0.007    | -0.023, 0.038 | 0.173                    | -0.015   | -0.036, 0.007 |
|                          | <i>RELN</i>     | rs362691  | 0.936                    | 0.001    | -0.023, 0.025 | 0.819                    | -0.003   | -0.033, 0.026 | 0.517                    | 0.014    | -0.028, 0.056 |
|                          | <i>SHANK3</i>   | rs9616915 | 0.362                    | 0.008    | -0.009, 0.024 | 0.298                    | 0.011    | -0.010, 0.031 | 0.997                    | <0.001   | -0.028, 0.028 |
| <b>Tics &amp; autism</b> |                 |           |                          |          |               |                          |          |               |                          |          |               |
|                          | <i>CDH 9/10</i> | rs4307059 | 0.732                    | 0.003    | -0.012, 0.017 | 0.702                    | 0.004    | -0.017, 0.025 | 0.690                    | 0.004    | -0.018, 0.026 |
|                          | <i>CNTNAP2</i>  | rs2710102 | 0.113                    | -0.012   | -0.026, 0.003 | 0.21                     | -0.015   | -0.038, 0.008 | 0.574                    | -0.003   | -0.013, 0.007 |
|                          | <i>CNTNAP2</i>  | rs7794745 | 0.745                    | 0.003    | -0.013, 0.018 | 0.872                    | -0.002   | -0.027, 0.023 | 0.742                    | 0.002    | -0.008, 0.012 |
|                          | <i>RELN</i>     | rs362691  | 0.625                    | 0.005    | -0.016, 0.026 | 0.710                    | 0.006    | -0.025, 0.036 | 0.644                    | 0.008    | -0.026, 0.042 |
|                          | <i>SHANK3</i>   | rs9616915 | 0.269                    | 0.008    | -0.006, 0.022 | 0.263                    | 0.012    | -0.009, 0.032 | 0.656                    | 0.005    | -0.017, 0.028 |

<sup>a</sup>The children's age when their parents answered the A-TAC questionnaire (9 or 12 years old). <sup>b</sup>Effect size presented as the regression coefficient (95% CI). A-TAC=Autism-Tics, ADHD, and Other Co-morbidities inventory.
